# Supplementary material for: Diagnostic accuracy of adrenal imaging for subtype diagnosis in primary aldosteronism: systematic review and meta-analysis
Source: PubMed Central journal article supplement — BMJ Open. 2020 Dec 31;10(12):e038489. doi: 10.1136/bmjopen-2020-038489 (PMC7780716; doi:10.1136/bmjopen-2020-038489), 2020-12-31
Supplement: bmjopen-2020-038489supp001.pdf [file bmjopen-2020-038489supp001.pdf]

### Search strategies for PubMed

#1. ((aldosteronism) OR (primary hyperaldosteronism) OR (primary aldosteronism) OR (conn syndrome) OR (conn) OR (aldosterone-producing adenoma) OR (APA) OR (idiopathic hyperaldosteronism) OR (IHA) OR (primary adrenal hyperplasia) OR (PAH) OR (bilateral adrenal hyperplasia) OR (BAH))

#2. ((adrenal venous sampling) OR (AVS) OR (adrenal vein sampling) OR (adrenal vein) OR (venous sampling) OR (vein sampling) OR (adrenal venous))

#3. ("2000/01/01"[Date - Entry] : "2020/01/01"[Date - Entry])

#4. #1 AND #2 AND #3
