# Supplementary material for: Diagnostic accuracy of adrenal imaging for subtype diagnosis in primary aldosteronism: systematic review and meta-analysis
Source: PubMed Central journal article supplement — BMJ Open. 2020 Dec 31;10(12):e038489. doi: 10.1136/bmjopen-2020-038489 (PMC7780716; doi:10.1136/bmjopen-2020-038489), 2020-12-31
Supplement: bmjopen-2020-038489supp002.pdf [file bmjopen-2020-038489supp002.pdf]

Table S2: original data

| Study, Year               | Age<br>(years) | TP  | FP  | FN  | TN  |
|---------------------------|----------------|-----|-----|-----|-----|
| Li et al. 2019            | 48.5           | 72  | 13  | 21  | 16  |
|                           | <35            | 11  | 1   | 0   | 2   |
| Campbell et al.2019       | 55.6           | 29  | 32  | 6   | 7   |
| Aono et al. 2019          | 56             | 52  | 46  | 102 | 117 |
|                           | <35            | 3   | 2   | 0   | 0   |
| Sam et al.2019            | 52.1           | 101 | 75  | 57  | 109 |
| Umakoshi et al.2018       | 53             | 297 | 322 | 185 | 787 |
|                           | <35            | 27  | 3   | 0   | 0   |
| Nanba et al.2017          | 54             | 58  | 42  | 25  | 22  |
| Kamemura et al.2017       | 54             | 60  | 88  | 36  | 209 |
| Zhu et al. 2016           | 46             | 87  | 79  | 116 | 112 |
|                           | <40            | 30  | 35  | 1   | 0   |
| Pedersen et al.2016       | 51             | 26  | 2   | 14  | 3   |
| Kocjan et al. 2016        | 56             | 23  | 21  | 5   | 18  |
| Asmar et al. 2015         | 55             | 96  | 65  | 38  | 36  |
|                           | <40            | 9   | 5   | 6   | 3   |
| Riester et al. 2014       | 35             | 15  | 1   | 7   | 5   |
| Candy Sze et al. 2014     | 50.5           | 39  | 10  | 10  | 16  |
| Küppers et al.2012        | 46             | 26  | 5   | 23  | 33  |
|                           | <40            | 9   | 0   | 6   | 10  |
| Lau et al. 2012           | 51.8           | 18  | 4   | 8   | 9   |
| Burton et al. 2012        | 50.9           | 19  | 2   | 6   | 13  |
| Salem et al.2012          | 44.7           | 22  | 3   | 7   | 6   |
| Oh et al. 2012            | 50.7           | 59  | 15  | 4   | 8   |
| Sarlon-Bartoli et al.2011 | 52             | 29  | 16  | 6   | 7   |
| Mathur et al. 2010        | 50.6           | 46  | 6   | 51  | 11  |
| Mulatero et al. 2008      | 52.4           | 27  | 11  | 4   | 28  |
| Minami et al.2008         | 54             | 12  | 9   | 6   | 8   |
| Nwariaku et al. 2006      | 51             | 14  | 4   | 14  | 8   |
| Young et al. 2004         | 53             | 57  | 48  | 42  | 47  |
| Magill et al.2001         | 51             | 8   | 8   | 9   | 13  |

TP: true-positive; TN: true-negative; FP: false-positive; FN: false-negative.
