# Supplementary material for: Diagnostic accuracy of adrenal imaging for subtype diagnosis in primary aldosteronism: systematic review and meta-analysis
Source: PubMed Central journal article supplement — BMJ Open. 2020 Dec 31;10(12):e038489. doi: 10.1136/bmjopen-2020-038489 (PMC7780716; doi:10.1136/bmjopen-2020-038489), 2020-12-31
Supplement: bmjopen-2020-038489supp003.pdf [file bmjopen-2020-038489supp003.pdf]

Table S3: The quality assessment for each study -QUADAS-2 results

| Study                | Risk of bias      |            |                    |                 | Applicability Concerns |            |                    |
|----------------------|-------------------|------------|--------------------|-----------------|------------------------|------------|--------------------|
|                      | Patient Selection | Index Test | Reference Standard | Flow and Timing | Patient Selection      | Index Test | Reference Standard |
| Li et al             | ☺                 | ☺          | ☺                  | ☺               | ☺                      | ☺          | ☺                  |
| Campbell et al       | ☺                 | ☺          | ☺                  | ☺               | ☺                      | ☺          | ☺                  |
| Aono et al           | ☺                 | ☺          | ⊗                  | ☺               | ☺                      | ☺          | ⊗                  |
| Sam et al et al      | ☺                 | ☺          | ?                  | ?               | ☺                      | ☺          | ☺                  |
| Umakoshi et al       | ☺                 | ☺          | ☺                  | ?               | ☺                      | ☺          | ☺                  |
| Nanba et al          | ☺                 | ☺          | ☺                  | ☺               | ☺                      | ☺          | ☺                  |
| Kamemura et al       | ☺                 | ☺          | ☺                  | ?               | ☺                      | ☺          | ☺                  |
| Zhu et al            | ☺                 | ☺          | ⊗                  | ☺               | ☺                      | ☺          | ⊗                  |
| Pedersen et al       | ☺                 | ☺          | ?                  | ☺               | ☺                      | ☺          | ☺                  |
| Kocjan et al         | ☺                 | ☺          | ☺                  | ☺               | ☺                      | ☺          | ☺                  |
| Asmar et al          | ☺                 | ☺          | ☺                  | ☺               | ☺                      | ☺          | ☺                  |
| Riester et al        | ☺                 | ☺          | ☺                  | ☺               | ☺                      | ☺          | ☺                  |
| Candy Sze et al      | ☺                 | ☺          | ☺                  | ☺               | ☺                      | ☺          | ☺                  |
| Kúpers et al         | ☺                 | ☺          | ?                  | ?               | ☺                      | ☺          | ☺                  |
| Lau et al            | ☺                 | ☺          | ☺                  | ☺               | ☺                      | ☺          | ☺                  |
| Burton et al         | ☺                 | ☺          | ☺                  | ☺               | ☺                      | ☺          | ☺                  |
| Salem et al          | ☺                 | ☺          | ☺                  | ☺               | ☺                      | ☺          | ☺                  |
| Oh et al             | ☺                 | ☺          | ☺                  | ☺               | ☺                      | ☺          | ☺                  |
| Sarlon-Bartoli et al | ☺                 | ☺          | ☺                  | ☺               | ☺                      | ☺          | ☺                  |
| Mathur et al         | ☺                 | ☺          | ⊗                  | ☺               | ☺                      | ☺          | ☺                  |
| Mulatero et al       | ☺                 | ☺          | ☺                  | ☺               | ☺                      | ☺          | ☺                  |
| Minami et al         | ☺                 | ☺          | ?                  | ☺               | ☺                      | ☺          | ☺                  |
| Nwariaku et al       | ☺                 | ☺          | ?                  | ?               | ☺                      | ☺          | ☺                  |
| Young et al          | ☺                 | ☺          | ☺                  | ?               | ☺                      | ☺          | ☺                  |
| Magill et al         | ☺                 | ☺          | ☺                  | ⊗               | ☺                      | ☺          | ☺                  |

☺= low risk, ? = unclear risk, ⊗=high risk
