# Supplementary material for: Diagnostic accuracy of adrenal imaging for subtype diagnosis in primary aldosteronism: systematic review and meta-analysis
Source: PubMed Central journal article supplement — BMJ Open. 2020 Dec 31;10(12):e038489. doi: 10.1136/bmjopen-2020-038489 (PMC7780716; doi:10.1136/bmjopen-2020-038489), 2020-12-31
Supplement: bmjopen-2020-038489supp004.pdf [file bmjopen-2020-038489supp004.pdf]

### Supplementary Figure legends

Figure S1: Forest plots of sensitivity and specificity of adrenal imaging compared with AVS in young patients ( $\leq 40$  years).

Figure S2: Graphical presentation of the generalised linear mixed model exploring the impact of selected variables on sensitivity and specificity of adrenal imaging.

Figure S3 Graphs for sensitivity analyses: a goodness of fit, b bivariate normality, c influence analysis, and d outlier detection.

Figure S4: Deeks' funnel plot for checking the publication bias. DOR: diagnostic OR.
