# Supplementary figures and images for: Diagnostic accuracy of adrenal imaging for subtype diagnosis in primary aldosteronism: systematic review and meta-analysis
Source: PubMed Central journal article supplement — BMJ Open. 2020 Dec 31;10(12):e038489. doi: 10.1136/bmjopen-2020-038489 (PMC7780716; doi:10.1136/bmjopen-2020-038489), 2020-12-31

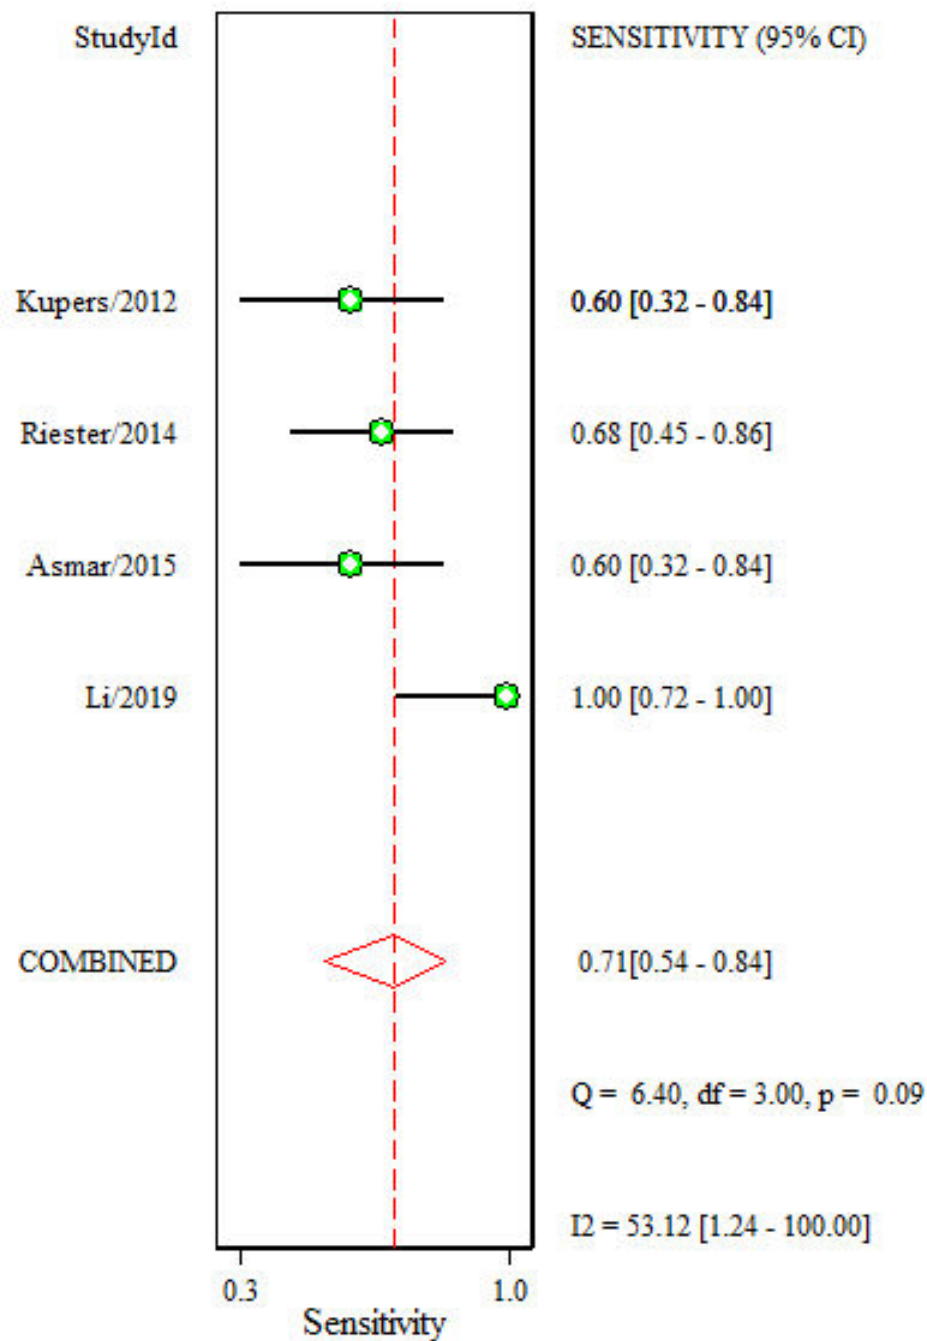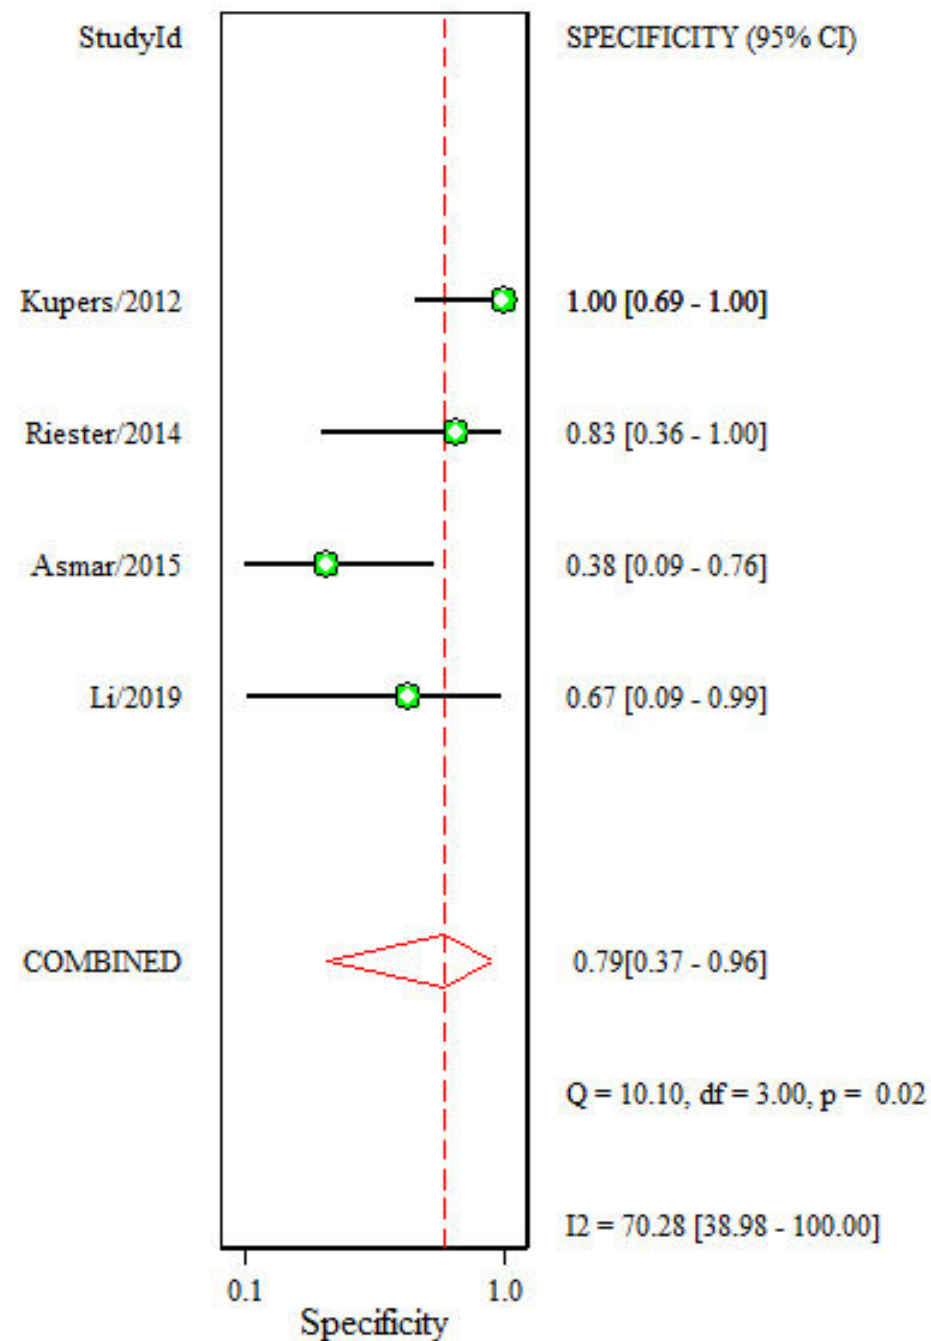

Supplement: bmjopen-2020-038489supp005.pdf [file bmjopen-2020-038489supp005.pdf]

## Univariable Meta-regression &amp; Subgroup Analyses

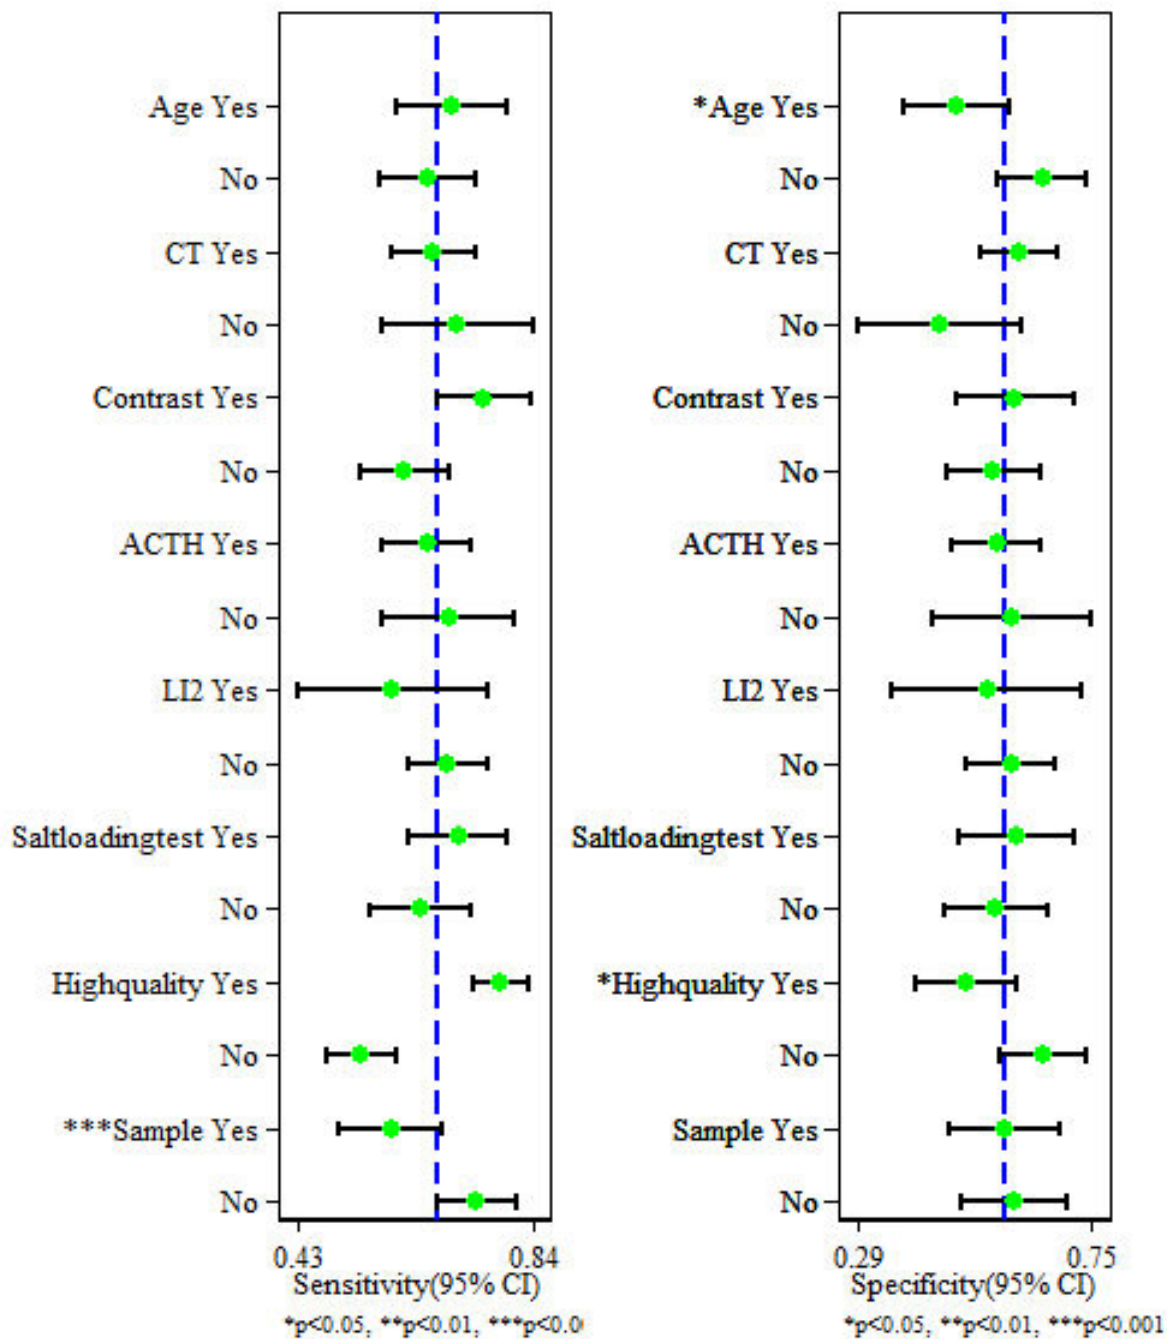

Supplement: bmjopen-2020-038489supp006.pdf [file bmjopen-2020-038489supp006.pdf]

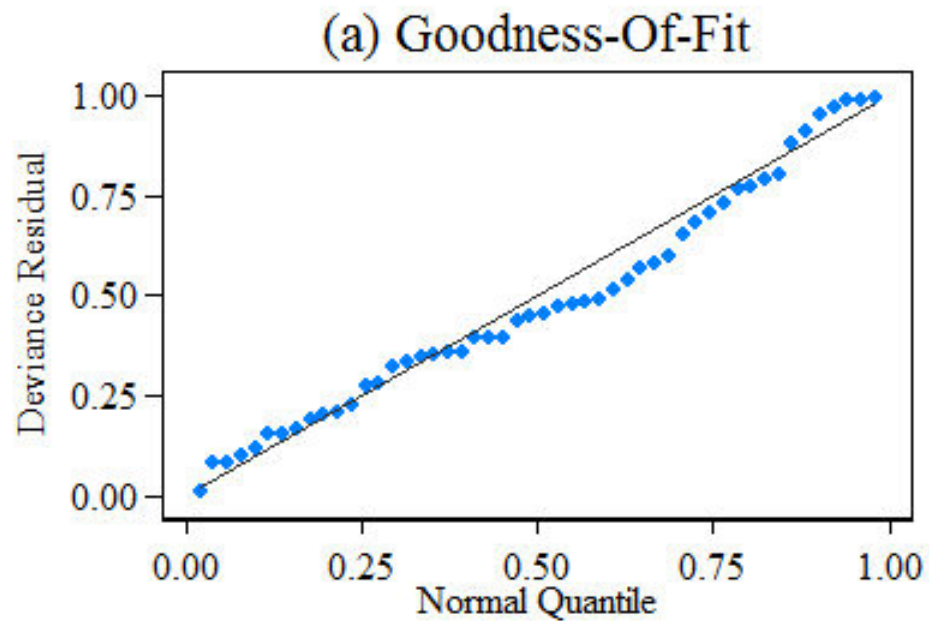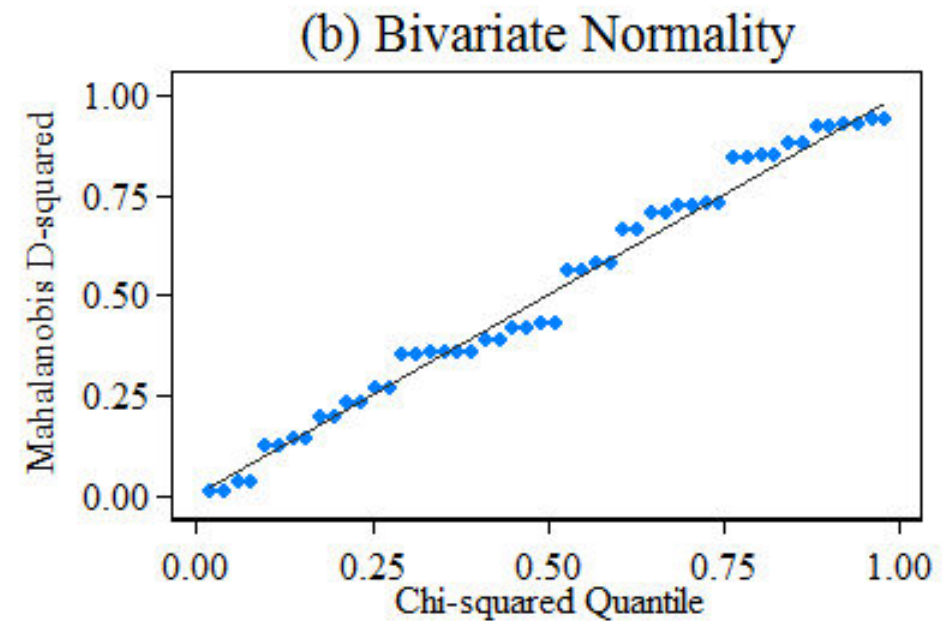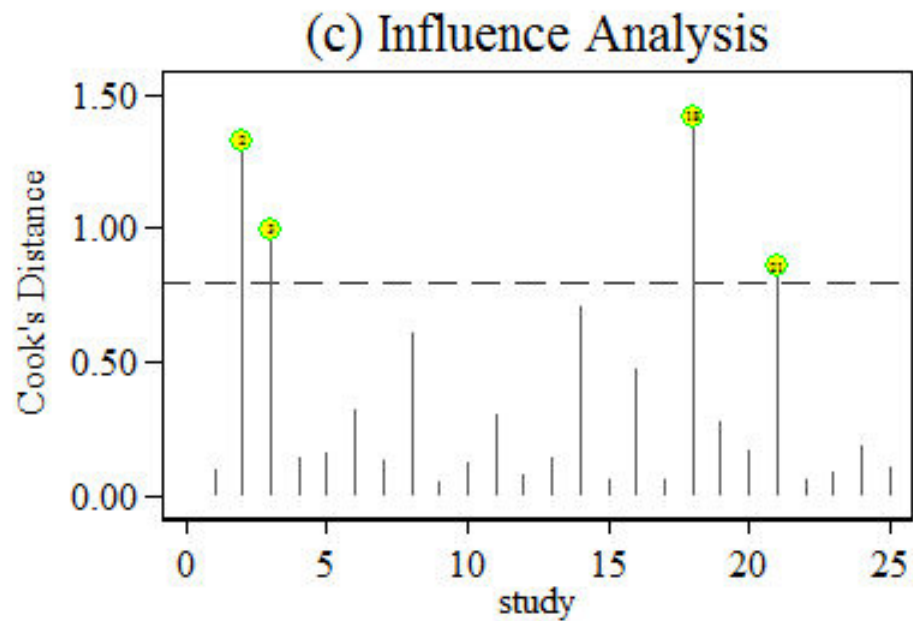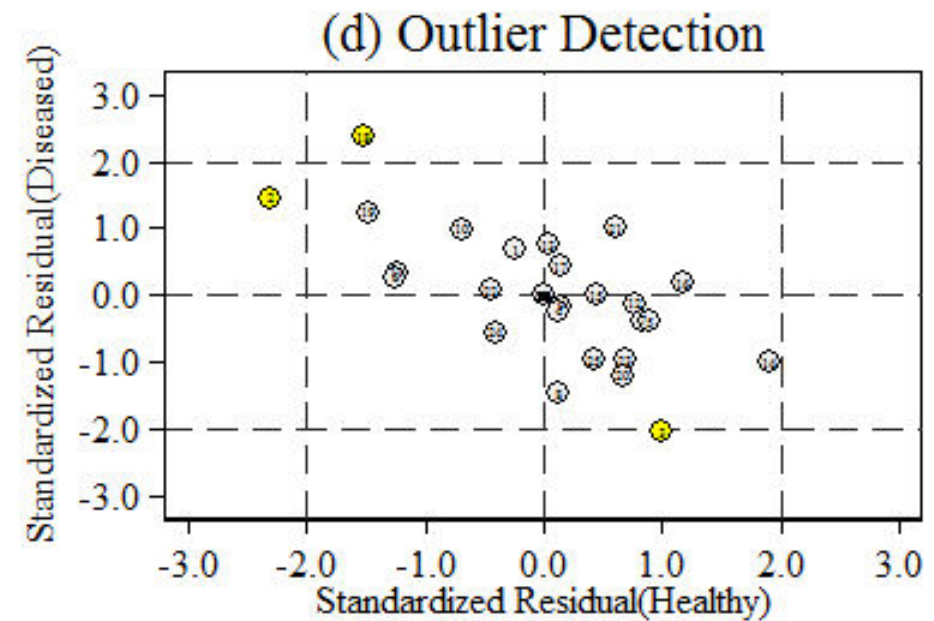

Supplement: bmjopen-2020-038489supp007.pdf [file bmjopen-2020-038489supp007.pdf]

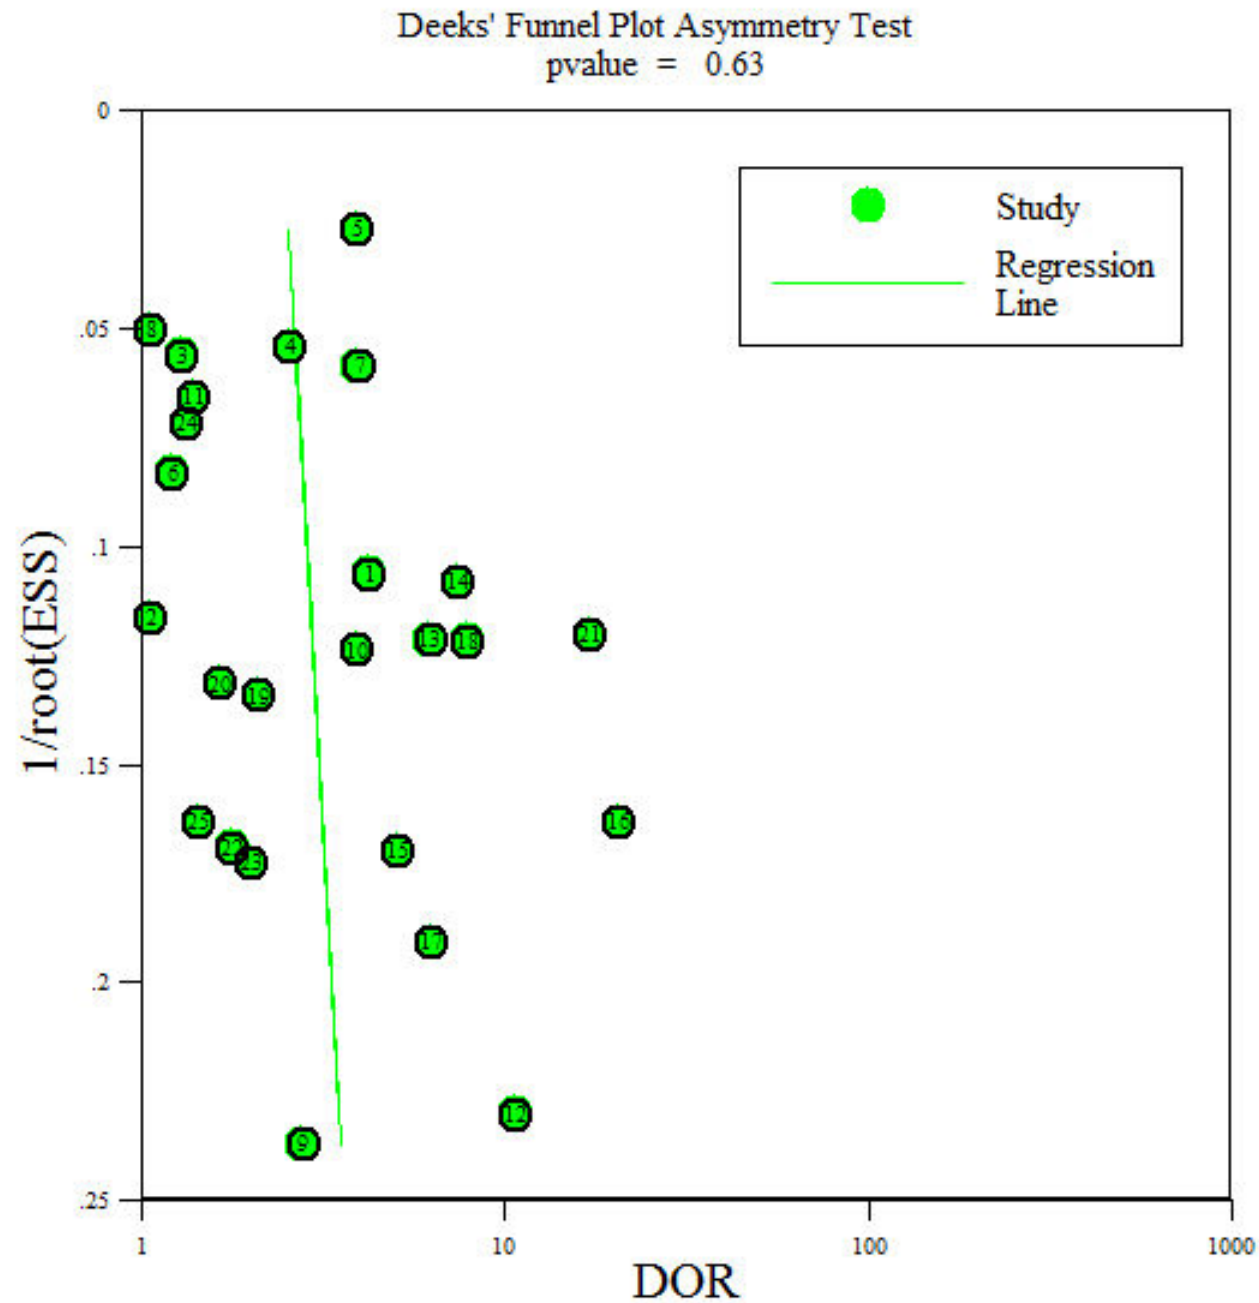

Supplement: bmjopen-2020-038489supp008.pdf [file bmjopen-2020-038489supp008.pdf]
